# Supplementary material
Source: bioRxiv or medRxiv preprint supplement (https://www.biorxiv.org/highwire/filestream/72700/field_highwire_adjunct_files/5/237255-4.pdf)
Supplement: Supplementary file [file 237255-4.pdf]

Table S4. Assignment of KEGG accessions to the predicted *V. nonalfalfae* secreted proteins

| KEGG accession                                                                                        | Accepted name for KEGG accession                                  | Number |
|-------------------------------------------------------------------------------------------------------|-------------------------------------------------------------------|--------|
| <b>OXIDOREDUCTASE (EC:1.)</b>                                                                         |                                                                   | 41     |
| EC:1.1.1.158                                                                                          | UDP-N-acetylmuramate dehydrogenase                                | 18     |
| EC:1.1.1.158, EC:1.1.3.37                                                                             | UDP-N-acetylmuramate dehydrogenase; D-arabinono-                  | 1      |
| EC:1.1.99.1 (ec00260:Glycine, serine and threonine metabolism; ec01100:Metabolic pathways)            | choline dehydrogenase                                             | 10     |
| EC:1.11.1.6 (ec00380:Tryptophan metabolism; ec00630:Glyoxylate and dicarboxylate metabolism;          | catalase                                                          | 2      |
| EC:1.11.1.7 (ec00360:Phenylalanine metabolism; ec00940:Phenylpropanoid biosynthesis;                  | peroxidase                                                        | 7      |
| EC:1.13.11.1 (ec00361:Chlorocyclohexane and chlorobenzene degradation; ec00362:Benzoate               | catechol 1,2-dioxygenase                                          | 2      |
| EC:1.4.3.3 (ec00260:Glycine, serine and threonine metabolism; ec00311:Penicillin and cephalosporin    | D-amino-acid oxidase                                              | 1      |
| <b>TRANSFERASE (EC:2.)</b>                                                                            |                                                                   | 4      |
| EC:2.1.1.43 (ec00310:Lysine degradation)                                                              | histone-lysine N-methyltransferase                                | 1      |
| EC:2.3.2.2 (ec00430:Taurine and hypotaurine metabolism; ec00460:Cyanoamino acid metabolism;           | $\gamma$ -glutamyltransferase                                     | 1      |
| EC:2.4.1.1 (ec00500:Starch and sucrose metabolism; ec01100:Metabolic pathways; ec01110:Biosynthesis   | glycogen phosphorylase                                            | 1      |
| EC:2.4.1.119                                                                                          | dolichyl-diphosphooligosaccharideprotein                          | 1      |
| <b>HYDROLASE (EC:3.)</b>                                                                              |                                                                   | 157    |
| EC:3.1.1.1 (ec00983:Drug metabolism - other enzymes)                                                  | carboxylesterase                                                  | 2      |
| EC:3.1.1.1 (ec00983:Drug metabolism - other enzymes); EC:3.4.21.1                                     | carboxylesterase; chymotrypsin                                    | 2      |
| EC:3.1.1.1 (ec00983:Drug metabolism - other enzymes); EC:3.4.22.1                                     | carboxylesterase; cathepsin B                                     | 1      |
| EC:3.1.1.11 (ec00040:Pentose and glucuronate interconversions; ec00500:Starch and sucrose metabolism; | pectinesterase                                                    | 4      |
| EC:3.1.1.3 (ec00561:Glycerolipid metabolism; ec01100:Metabolic pathways)                              | triacylglycerol lipase                                            | 4      |
| EC:3.1.1.47 (ec00565:Ether lipid metabolism; ec01100:Metabolic pathways)                              | 1-alkyl-2-acetylgllycerophosphocholine esterase                   | 1      |
| EC:3.1.1.72                                                                                           | acetylxyln esterase                                               | 2      |
| EC:3.1.1.74                                                                                           | cutinase                                                          | 7      |
| EC:3.1.27.1                                                                                           | ribonuclease T2                                                   | 1      |
| EC:3.1.3.1 (ec00627:Aminobenzoate degradation; ec00790:Folate biosynthesis; ec01100:Metabolic         | alkaline phosphatase                                              | 1      |
| EC:3.1.3.2 (ec00627:Aminobenzoate degradation; ec00740:Riboflavin metabolism; ec01120:Microbial       | acid phosphatase                                                  | 1      |
| EC:3.1.3.41 (ec00627:Aminobenzoate degradation; ec01120:Microbial metabolism in diverse               | 4-nitrophenylphosphatase                                          | 3      |
| EC:3.1.3.75 (ec00564:Glycerophospholipid metabolism; ec01100:Metabolic pathways)                      | phosphoethanolamine/phosphocholine phosphatase                    | 1      |
| EC:3.1.3.8 (ec00562:Inositol phosphate metabolism)                                                    | 3-phytase                                                         | 1      |
| EC:3.1.6.1 (ec00140:Steroid hormone biosynthesis; ec00600:Sphingolipid metabolism)                    | arylsulfatase                                                     | 1      |
| EC:3.2.1.1 (ec00500:Starch and sucrose metabolism; ec01100:Metabolic pathways); EC:2.4.1.18           | $\alpha$ -amylase; 1,4- $\alpha$ -glucan branching enzyme         | 1      |
| EC:3.2.1.101                                                                                          | mannan endo-1,6- $\alpha$ -mannosidase                            | 1      |
| EC:3.2.1.113 (ec00510:N-Glycan biosynthesis; ec00513:Various types of N-glycan biosynthesis;          | mannosyl-oligosaccharide 1,2- $\alpha$ -mannosidase               | 4      |
| EC:3.2.1.139                                                                                          | $\alpha$ -glucuronidase                                           | 1      |
| EC:3.2.1.14 (ec00520:Amino sugar and nucleotide sugar metabolism; ec01110:Biosynthesis of secondary   | chitinase                                                         | 4      |
| EC:3.2.1.15 (ec00040:Pentose and glucuronate interconversions; ec00500:Starch and sucrose metabolism; | polygalacturonase                                                 | 10     |
| EC:3.2.1.15 (ec00040:Pentose and glucuronate interconversions; ec00500:Starch and sucrose metabolism; | polygalacturonase; galacturan 1,4- $\alpha$ -galacturonidase      | 1      |
| EC:3.2.1.155                                                                                          | xyloglucan-specific exo-beta-1,4-glucanase                        | 1      |
| EC:3.2.1.17                                                                                           | lysozyme                                                          | 1      |
| EC:3.2.1.21 (ec00460:Cyanoamino acid metabolism; ec00500:Starch and sucrose metabolism;               | $\beta$ -glucosidase                                              | 4      |
| EC:3.2.1.23 (ec00052:Galactose metabolism; ec00511:Other glycan degradation;                          | $\beta$ -galactosidase                                            | 1      |
| EC:3.2.1.28 (ec00500:Starch and sucrose metabolism; ec01100:Metabolic pathways)                       | $\alpha$ -trehalase                                               | 1      |
| EC:3.2.1.3 (ec00500:Starch and sucrose metabolism; ec01100:Metabolic pathways)                        | glucan 1,4- $\alpha$ -glucosidase                                 | 2      |
| EC:3.2.1.37 (ec00500:Starch and sucrose metabolism; ec00520:Amino sugar and nucleotide sugar          | xylan 1,4- $\beta$ -xylosidase; non-reducing end $\alpha$ -L-     | 1      |
| EC:3.2.1.4 (ec00500:Starch and sucrose metabolism; ec01100:Metabolic pathways)                        | cellulase                                                         | 10     |
| EC:3.2.1.45 (ec00511:Other glycan degradation; ec00600:Sphingolipid metabolism; ec01100:Metabolic     | glucosylceramidase                                                | 1      |
| EC:3.2.1.52 (ec00511:Other glycan degradation; ec00513:Various types of N-glycan biosynthesis;        | $\beta$ -N-acetylhexosaminidase                                   | 2      |
| EC:3.2.1.55 (ec00520:Amino sugar and nucleotide sugar metabolism; ec01110:Biosynthesis of secondary   | non-reducing end $\alpha$ -L-arabinofuranosidase                  | 3      |
| EC:3.2.1.6                                                                                            | endo-1,3(4)- $\beta$ -glucanase                                   | 1      |
| EC:3.2.1.75                                                                                           | glucan endo-1,6-beta-glucosidase                                  | 1      |
| EC:3.2.1.78 (ec00051:Fructose and mannose metabolism)                                                 | mannan endo-1,4- $\beta$ -mannosidase                             | 3      |
| EC:3.2.1.78 (ec00051:Fructose and mannose metabolism); EC:3.2.1.4 (ec00500:Starch and sucrose         | mannan endo-1,4- $\beta$ -mannosidase; cellulase                  | 1      |
| EC:3.2.1.8                                                                                            | endo-1,4- $\beta$ -xylanase                                       | 4      |
| EC:3.2.1.89; EC:3.2.1.1 (ec00500:Starch and sucrose metabolism; ec01100:Metabolic pathways)           | arabinogalactan endo- $\beta$ -1,4-galactanase; $\alpha$ -amylase | 1      |
| EC:3.2.1.91 (ec00500:Starch and sucrose metabolism; ec01100:Metabolic pathways); EC:3.2.1.4           | cellulose 1,4- $\beta$ -cellobiosidase (non-reducing end);        | 1      |
| EC:3.2.1.99                                                                                           | arabinan endo-1,5- $\alpha$ -L-arabinanase                        | 1      |
| EC:3.4.11.1 (ec00480:Glutathione metabolism; ec01100:Metabolic pathways)                              | leucyl aminopeptidase                                             | 7      |
| EC:3.4.11.4; EC:3.4.21.1                                                                              | tripeptide aminopeptidase; chymotrypsin                           | 1      |
| EC:3.4.16.1                                                                                           | carboxypeptidase D                                                | 5      |
| EC:3.4.16.1; EC:4.2.99.18                                                                             | carboxypeptidase D; DNA-(apurinic or apyrimidinic                 | 1      |
| EC:3.4.17.1                                                                                           | carboxypeptidase A                                                | 10     |
| EC:3.4.21.1                                                                                           | chymotrypsin                                                      | 15     |
| EC:3.4.23.1                                                                                           | pepsin A                                                          | 15     |
| EC:3.4.24.1                                                                                           | atrolysin A                                                       | 6      |
| EC:3.5.3.15                                                                                           | protein-arginine deiminase                                        | 1      |
| EC:3.6.1.1 (ec00190:Oxidative phosphorylation)                                                        | inorganic diphosphatase                                           | 1      |
| EC:3.6.1.10                                                                                           | endopolyphosphatase                                               | 1      |
| <b>LYASE (EC:4.)</b>                                                                                  |                                                                   | 23     |
| EC:4.2.1.1 (ec00910:Nitrogen metabolism)                                                              | carbonic anhydrase                                                | 1      |
| EC:4.2.2.10                                                                                           | pectin lyase                                                      | 2      |
| EC:4.2.2.2 (ec00040:Pentose and glucuronate interconversions)                                         | pectate lyase                                                     | 18     |
| EC:4.2.2.3 (ec00051:Fructose and mannose metabolism)                                                  | mannuronate-specific alginat lyase                                | 2      |
| <b>ISOMERASE (EC:5.)</b>                                                                              |                                                                   | 0      |
| <b>LIGASE (EC:6.)</b>                                                                                 |                                                                   | 0      |
